# Supplementary material for: Lipidomic Alterations and PPARα Activation Induced by Resveratrol Lead to Reduction in Lesion Size in Endometriosis Models
Source: Oxid Med Cell Longev. 2021 Sep 11;2021:9979953. doi: 10.1155/2021/9979953 (PMC8452402; doi:10.1155/2021/9979953)
Supplement: Supplementary Materials — Supplementary Figure 1: behavioral evaluation of model rats. Supplementary Figure 2: results of multivariate statistical analysis. Supplementary Figure 3: molecular characterization of related pathways. Supplementary Figure 4: molecular network mediated by resveratrol. Supplementary Table 1: a list of primers. [file 9979953.f1.zip]

Archive with 2 entries (2 files):
- 9979953.f1/9979953.f1.docx
- 9979953.f1/9979953.f2.docx
